# Supplementary material for: The Potential Biomarkers to Identify the Development of Steatosis in Hyperuricemia
Source: PLOS journal article supplement (doi:10.1371/journal.pone.0149043), 2016-02-18
Supplement: S1 (10.1371/journal.pone.0149043.s001) [file journal.pone.0149043.s001]

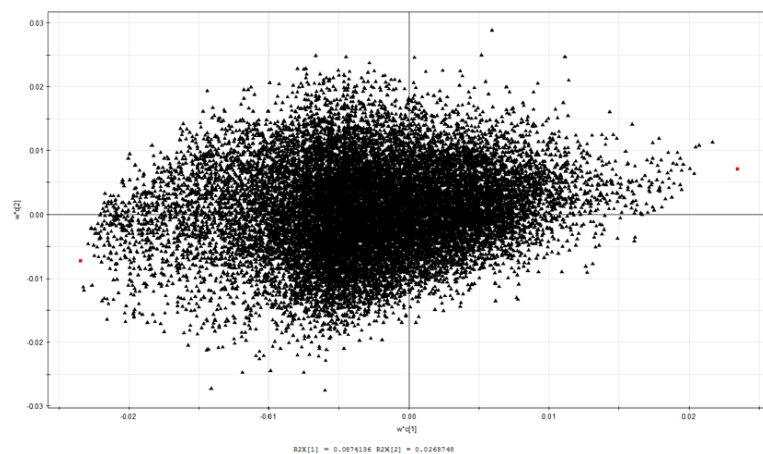

**S1 Fig.** Multiple pattern recognition of metabolites in Control and HU. PLS-DA loading plot ( $n = 49$ ). Each triangle in the plot represents an ion. Ions far away from origin were responsible for potential biomarkers.
